# Supplementary material for: Changes in Plant and Grain Quality of Winter Oat (Avena sativa L.) Varieties in Response to Silicon and Sulphur Foliar Fertilisation under Abiotic Stress Conditions
Source: MDPI journal article supplement (doi:10.3390/plants12040969), 2023-02-20
Supplement: s1 [file s1]

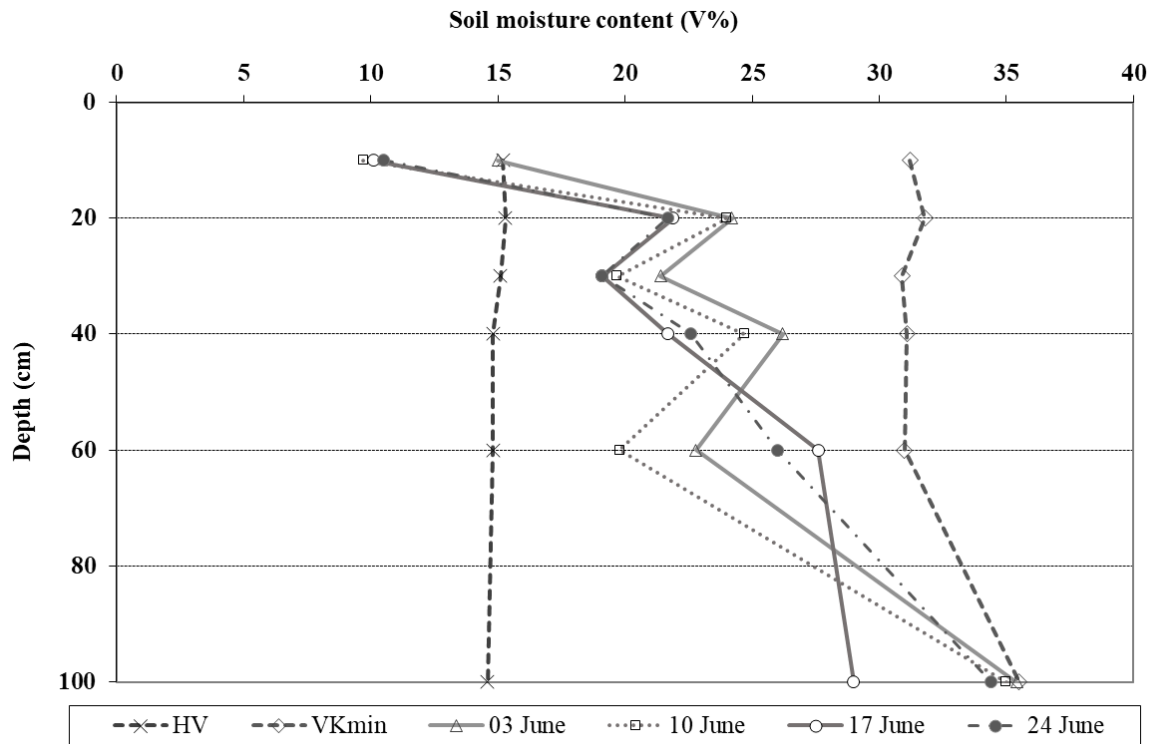

**Figure S3.** Soil moisture content in the 0 – 100 cm layer in the oat experiment from 3 to 24 June. (Debrecen, 2021). WP: permanent wilting point; FC: field capacity .
