# Supplementary material for: Changes in Plant and Grain Quality of Winter Oat (Avena sativa L.) Varieties in Response to Silicon and Sulphur Foliar Fertilisation under Abiotic Stress Conditions
Source: MDPI journal article supplement (doi:10.3390/plants12040969), 2023-02-20
Supplement: s1 [file s1]

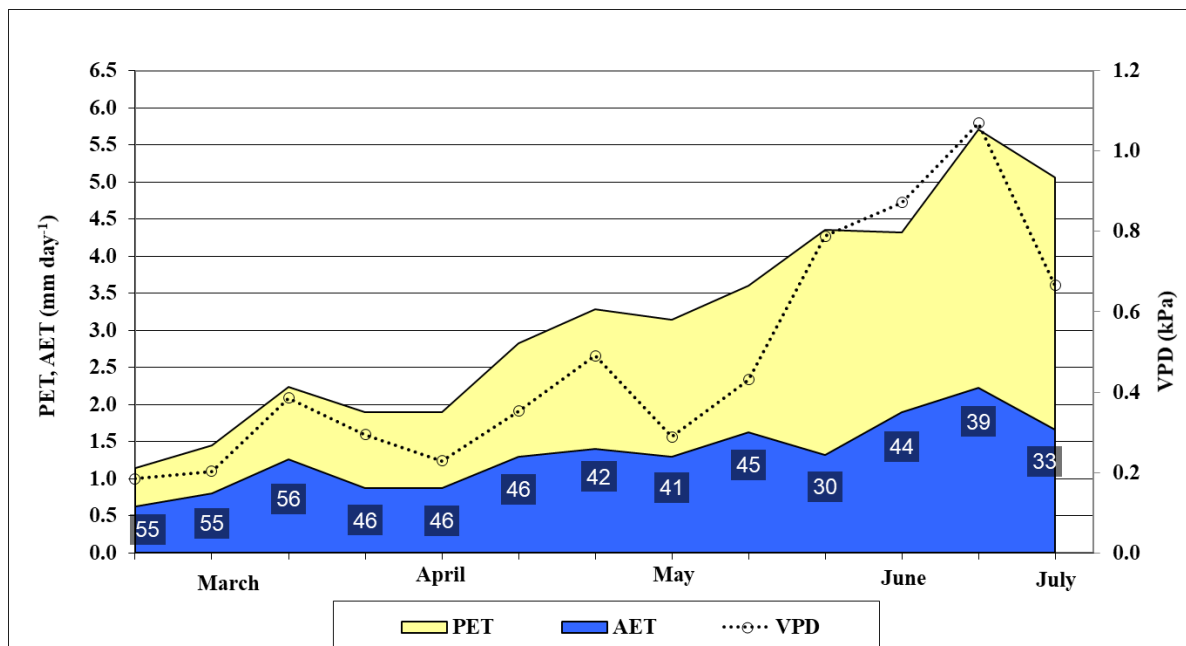

**Figure S2.** Potential (PET) and actual (AET) evapotranspiration, AET/PET ratio (%) and VPD in oats from March to June (Debrecen, 2021). Average of the decades. VPD: Vapour pressure deficit, calculated using meteorological data.
