# Supplementary material for: Changes in Plant and Grain Quality of Winter Oat (Avena sativa L.) Varieties in Response to Silicon and Sulphur Foliar Fertilisation under Abiotic Stress Conditions
Source: MDPI journal article supplement (doi:10.3390/plants12040969), 2023-02-20
Supplement: s1 [file s1]

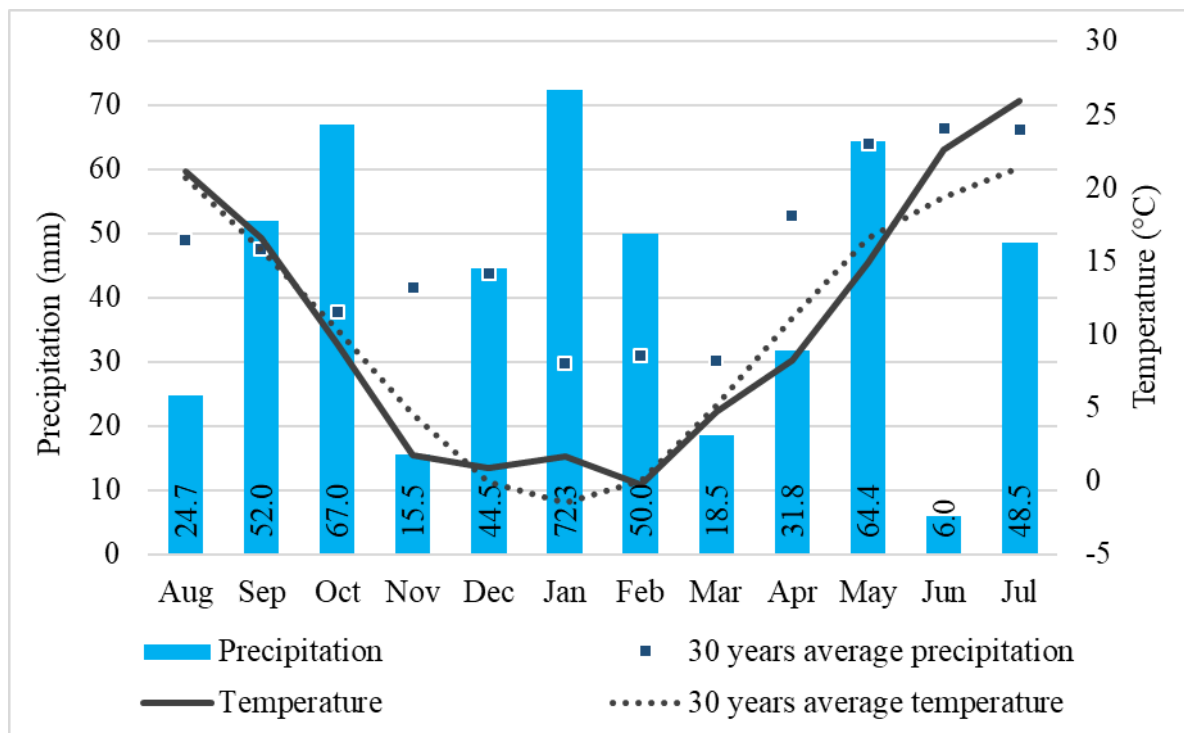

**Figure S1.** Monthly sums of precipitation and averages of temperature compared to the 30 years' average (Debrecen, 2020/2021). Numbers in the bars: sum precipitation of the month. 30 years' average: monthly averages of the period 1981–2010.
